# Supplementary material for: Motor processivity and speed determine structure and dynamics of microtubule-motor assemblies
Source: eLife journal article supplement (doi:10.7554/elife.79402), 2023-02-08

(a)

## EXPONENTIAL MOTOR DECAY

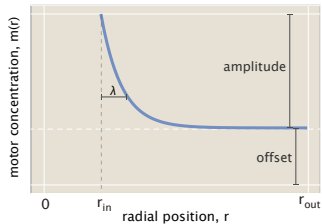

(b)

## SIGMOIDAL TUBULIN PROFILE

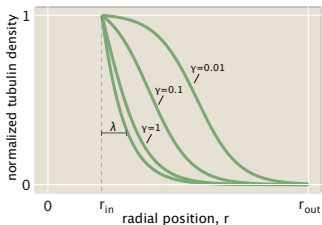

(c)

## EXAMPLE ASTER PROFILES

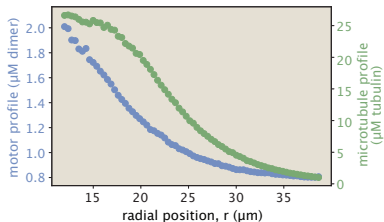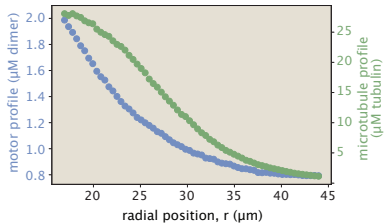

(d)

## POSITIONS OF MID-CONCENTRATION

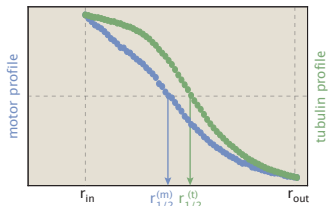

(e)

RATIOS OF  $(r_{1/2} - r_{in})$  VALUES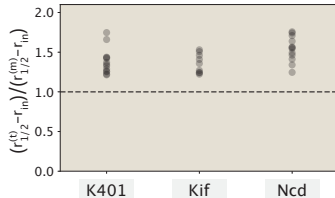

Supplement: supp [file elife-79402-supp-v1.zip]
