# Supplementary figures and images for: Motor processivity and speed determine structure and dynamics of microtubule-motor assemblies
Source: eLife journal article supplement (doi:10.7554/elife.79402), 2023-02-08

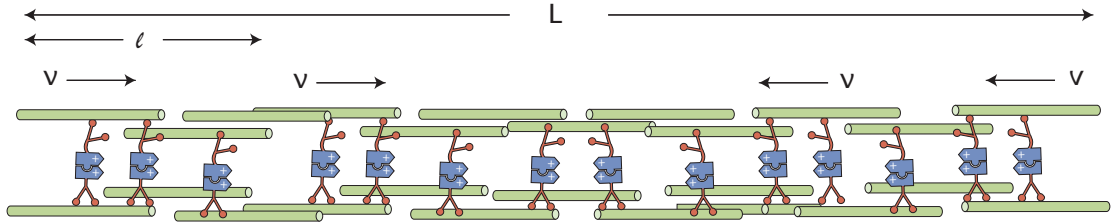

$$V_{\text{end}} \approx Nv$$

$$\approx (L/\ell) v$$

Supplement: supp [file elife-79402-supp-v1.zip]

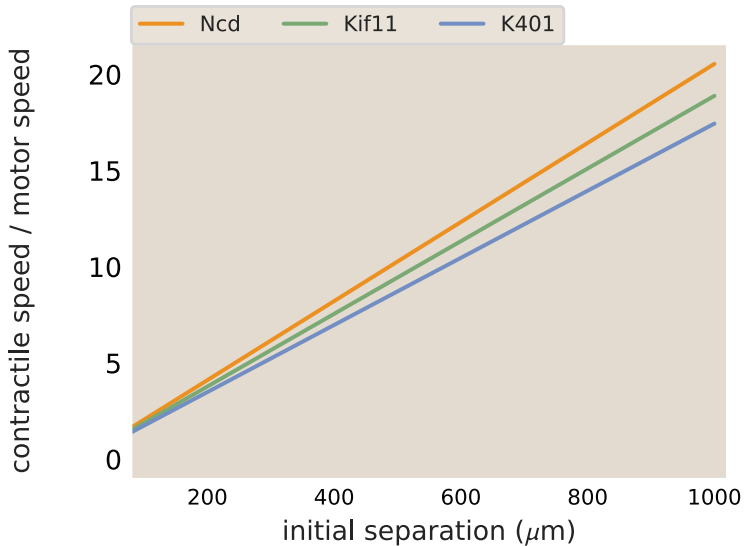

Supplement: supp [file elife-79402-supp-v1.zip]

## Examples of multiple asters

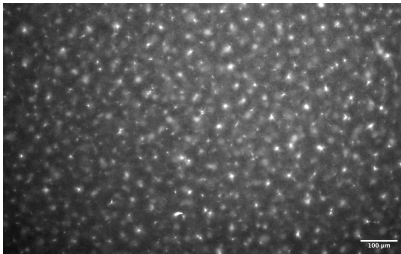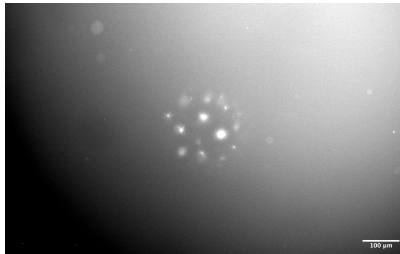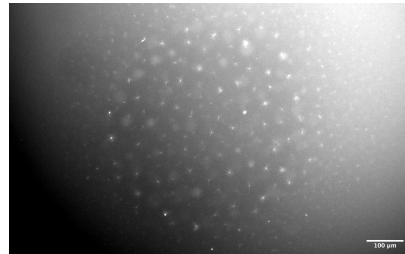

Supplement: supp [file elife-79402-supp-v1.zip]

(a)

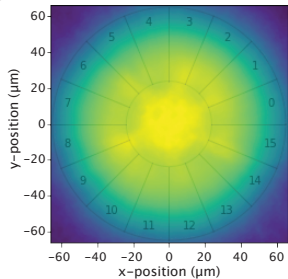

(b)

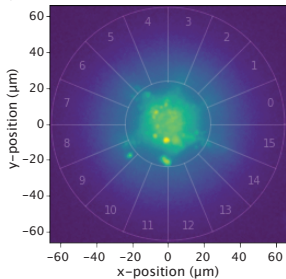

(c)

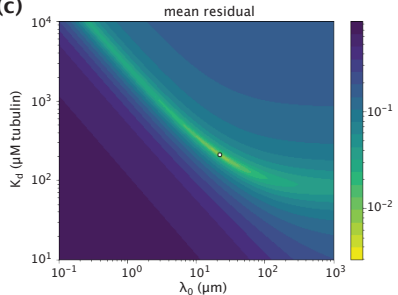

(d)

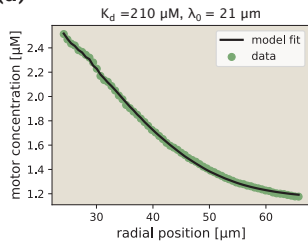

(e)

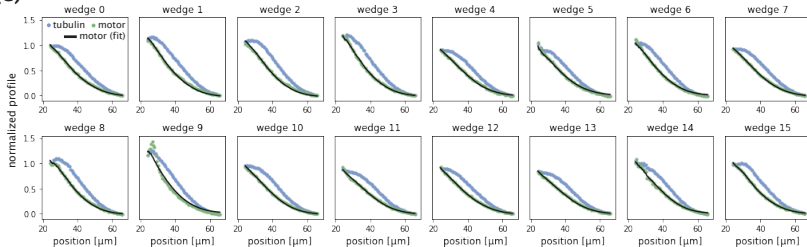

Supplement: supp [file elife-79402-supp-v1.zip]

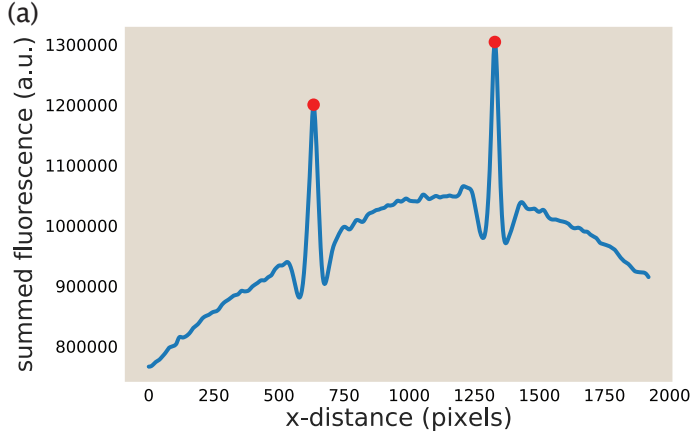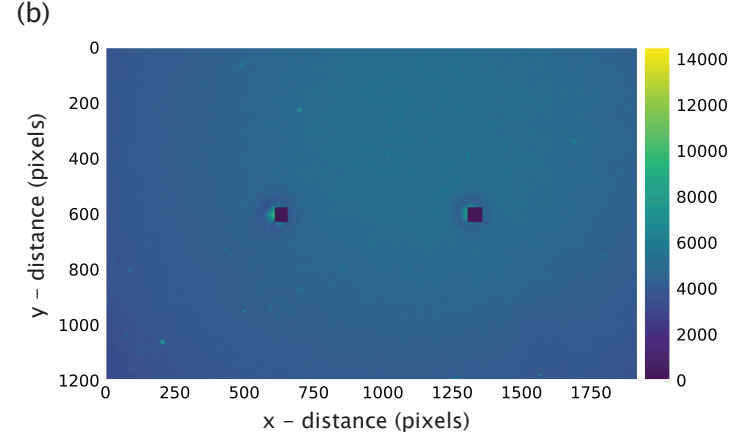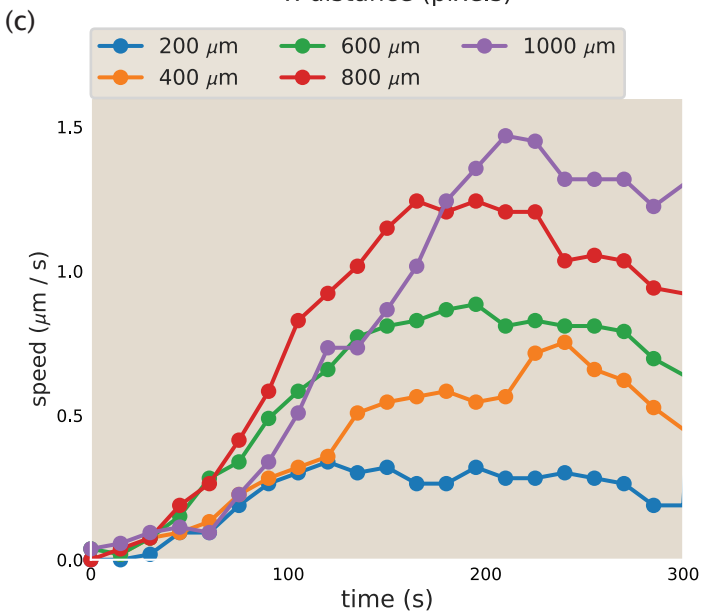

Supplement: supp [file elife-79402-supp-v1.zip]

K401

Kif11

Ncd236

600  $\mu\text{m}$ 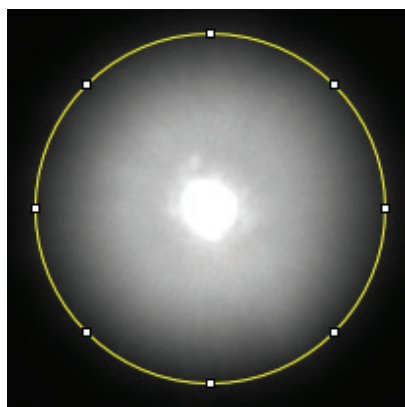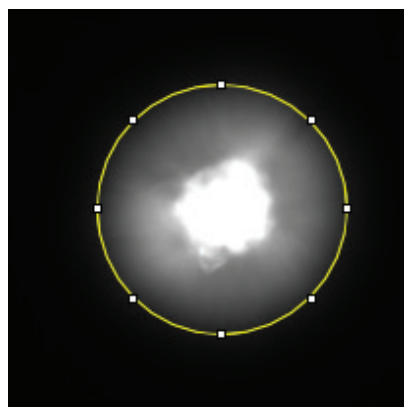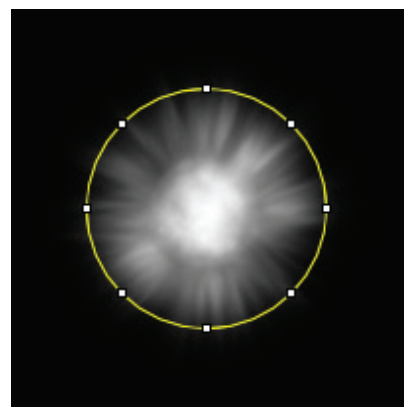400  $\mu\text{m}$ 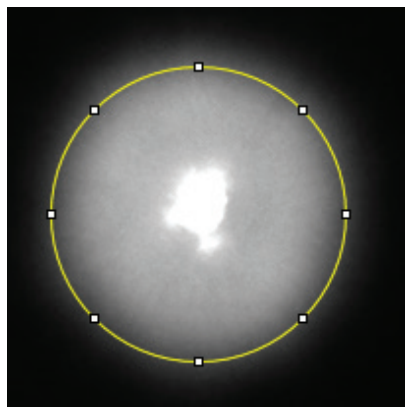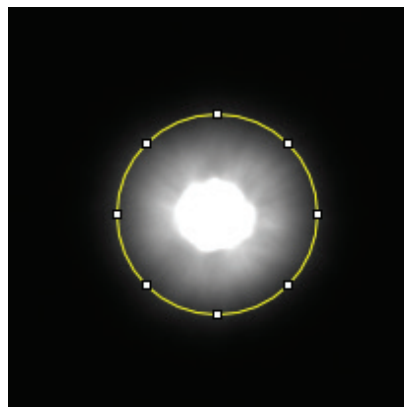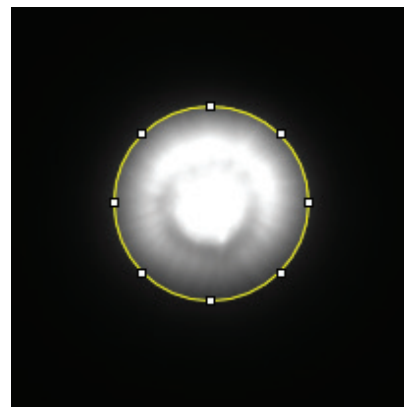200  $\mu\text{m}$ 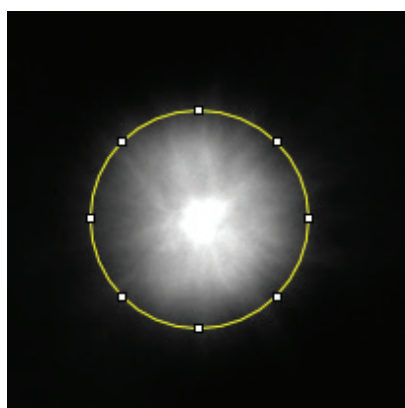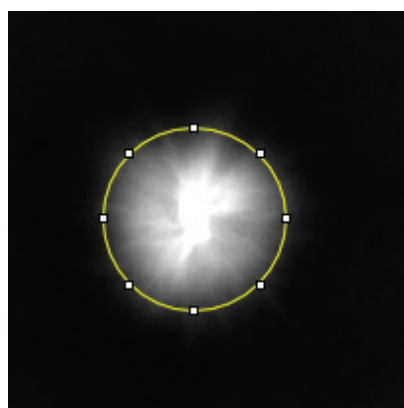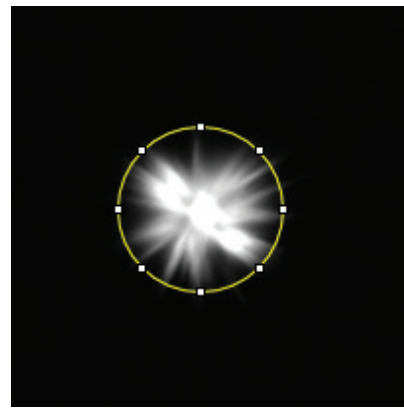100  $\mu\text{m}$ 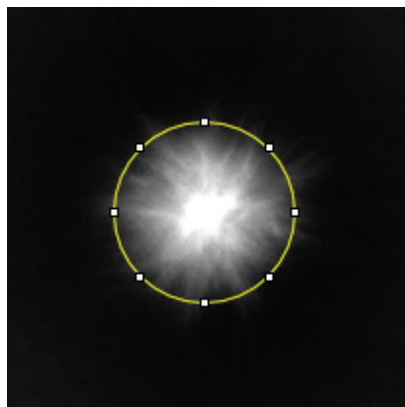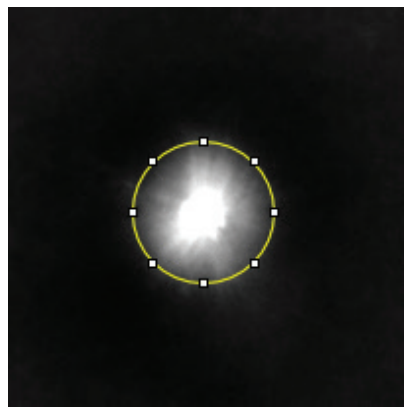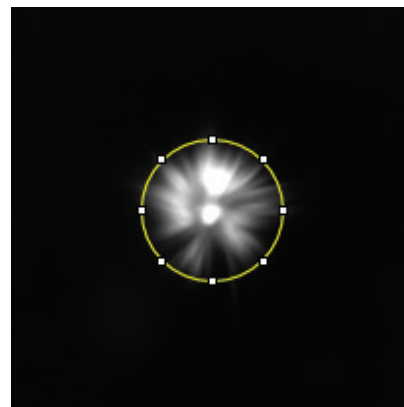50  $\mu\text{m}$ 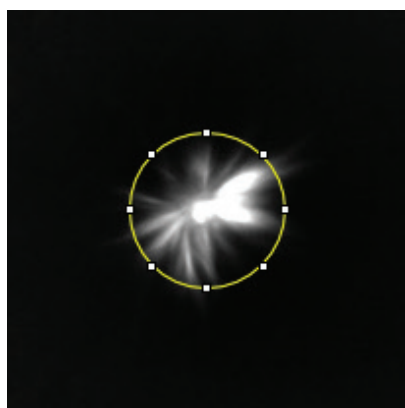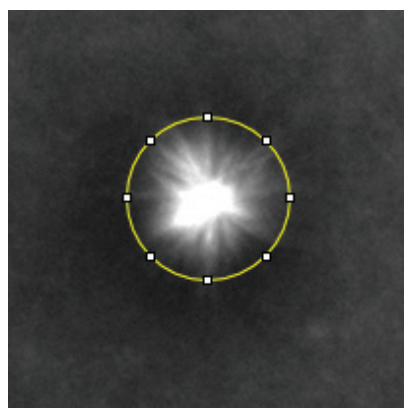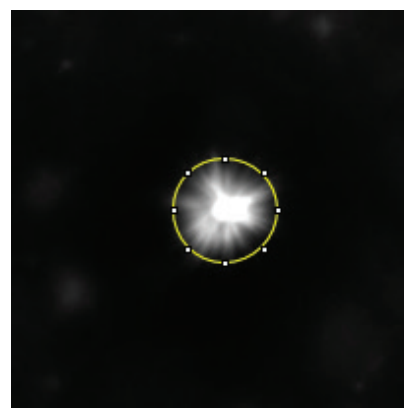 20  $\mu\text{m}$

Supplement: supp [file elife-79402-supp-v1.zip]

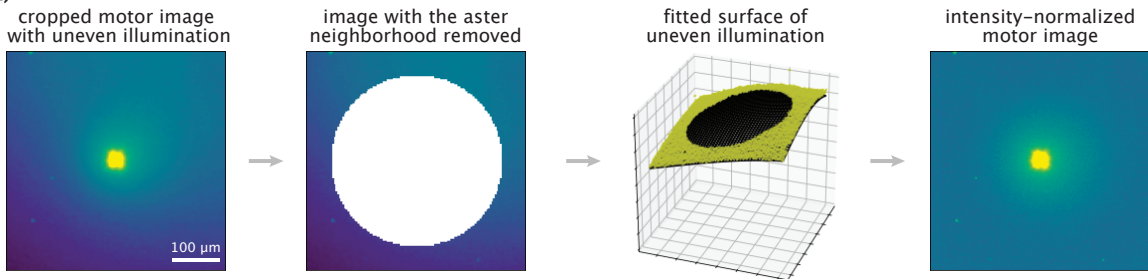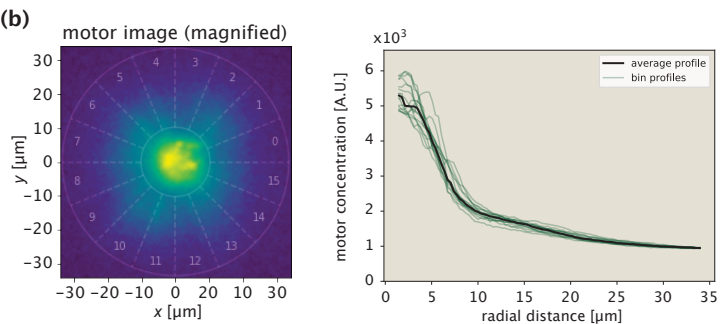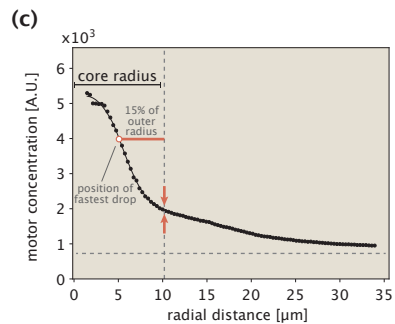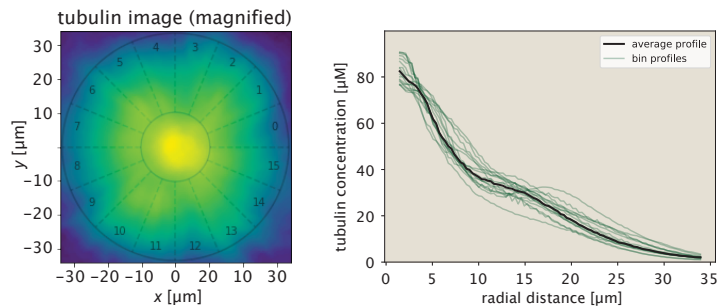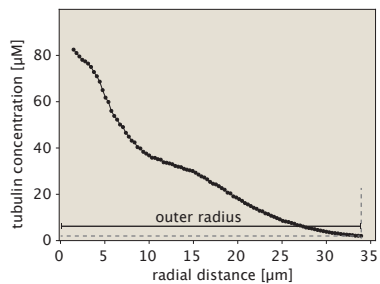

Supplement: supp [file elife-79402-supp-v1.zip]

K401

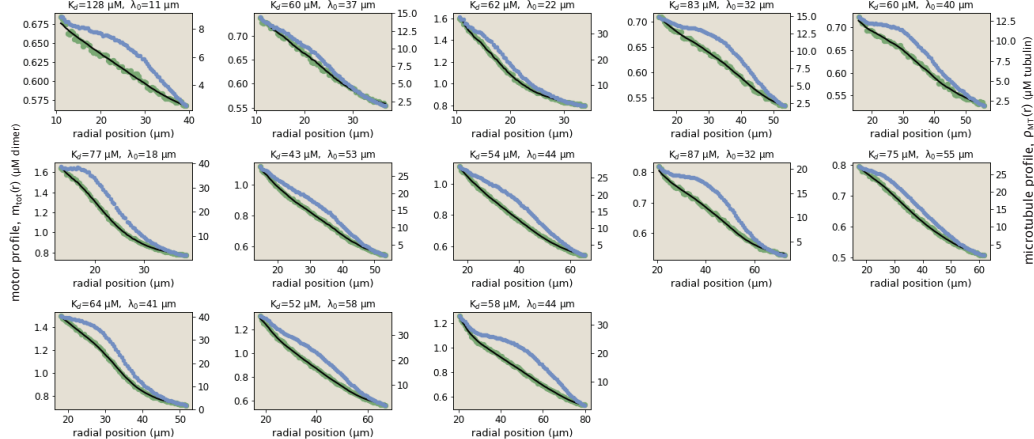

Kif

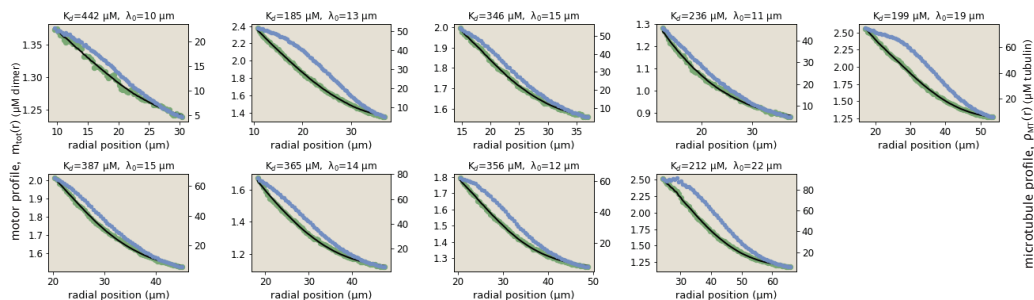

Ncd

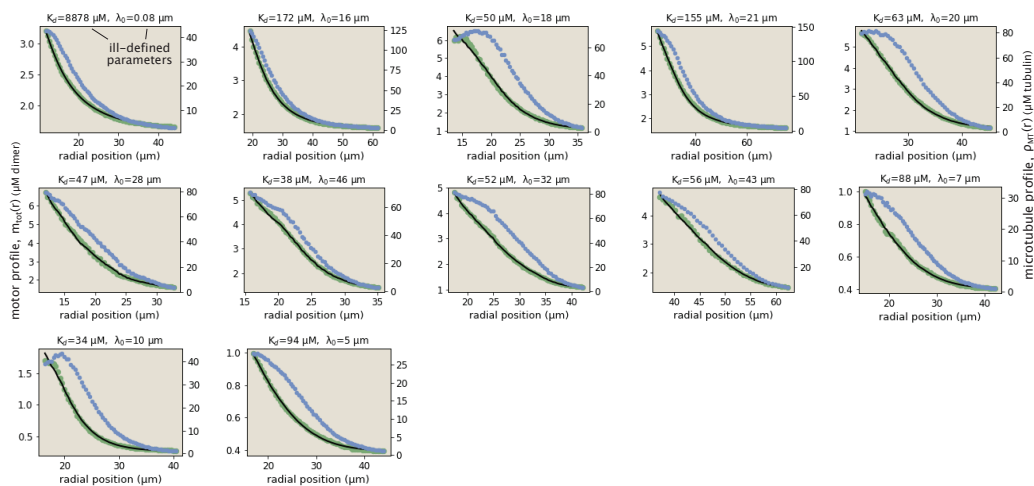

Supplement: supp [file elife-79402-supp-v1.zip]

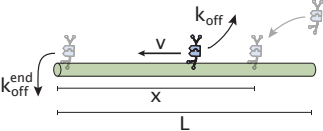

Supplement: supp [file elife-79402-supp-v1.zip]

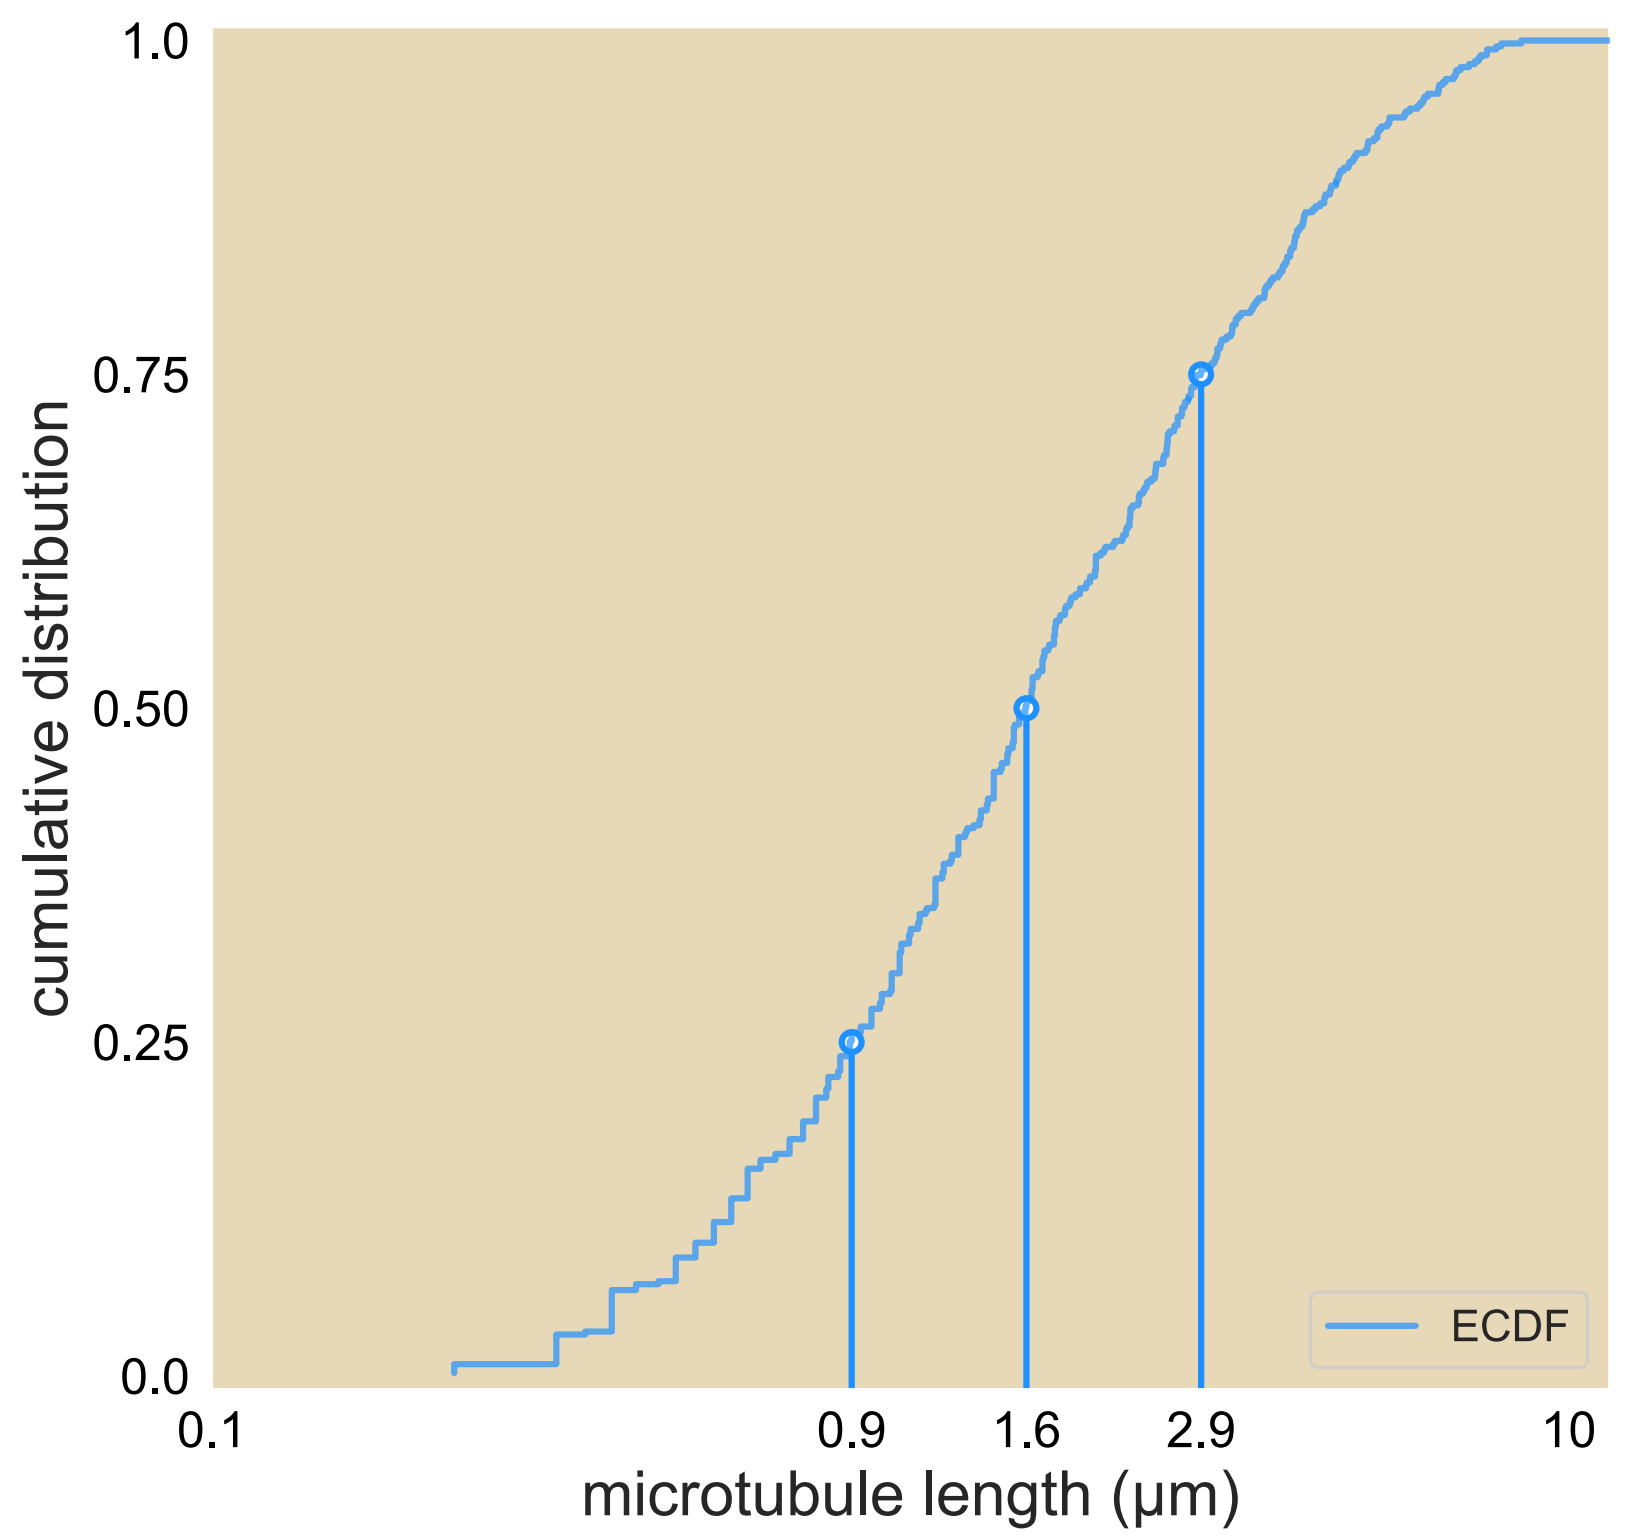

Supplement: supp [file elife-79402-supp-v1.zip]

## FLUORESCENCE RECOVERY IN A STEADY-STATE ASTER

$t = 0$  s

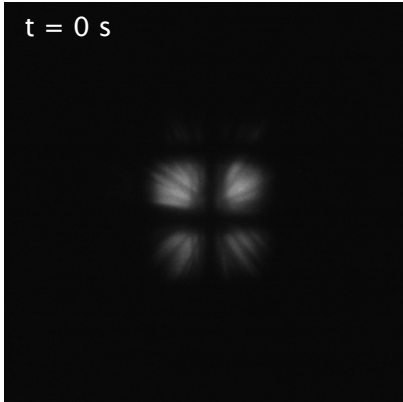

$t = 100$  s

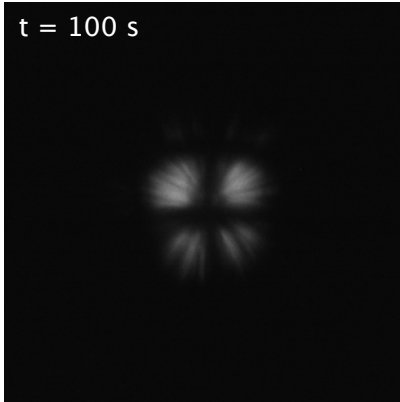

$t = 200$  s

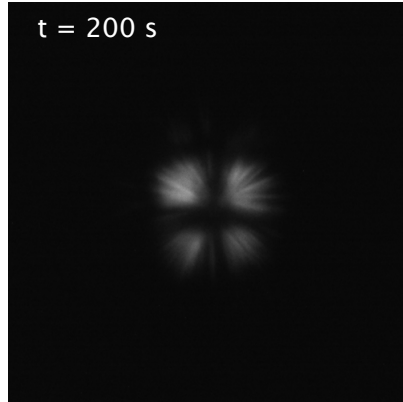

$t = 300$  s

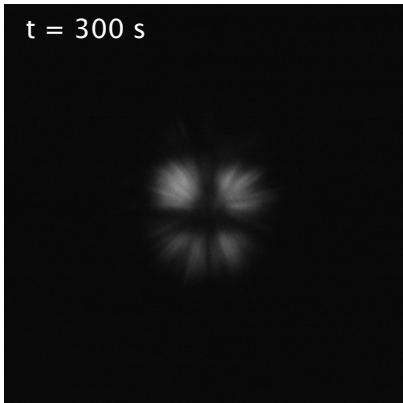

$t = 400$  s

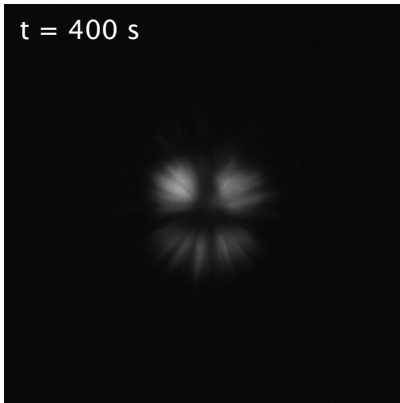

$t = 500$  s

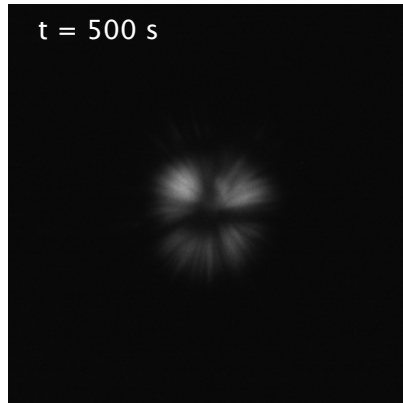

Supplement: supp [file elife-79402-supp-v1.zip]
